# Supplementary material for: PDZ-RhoGEF Is a Signaling Effector for TROY-Induced Glioblastoma Cell Invasion and Survival
Source: PubMed Central journal article supplement — Neoplasia. 2018 Sep 13;20(10):1045–58. doi: 10.1016/j.neo.2018.08.008 (PMC6140379; doi:10.1016/j.neo.2018.08.008), 2018-09-13
Supplement: mmc1.pdf [file mmc1.pdf]

## Supplementary Figure 1

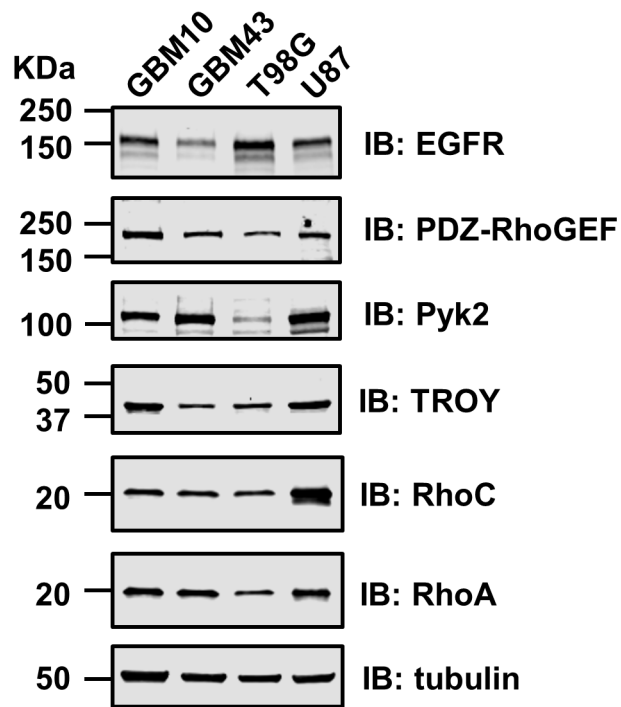

**Supplementary Figure 1.** The expression pattern profile of EGFR, PDZ-RhoGEF, Pyk2, TROY, RhoC and RhoA in GBM10, GBM43, T98G, and U87 cells.

Cell lysates were immunoblotted with the indicated antibodies.  $\alpha$ -tubulin was the loading control.

## Supplementary Figure 2

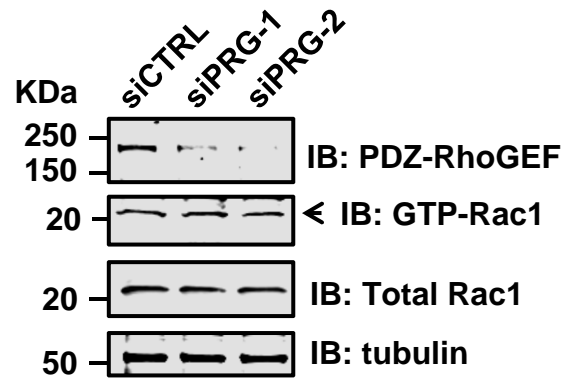

**Supplementary Figure 2.** Knockdown of PDZ-RhoGEF (PRG) does not affect Rac1 activation in T98G cells.

T98G cells were transfected with two different siRNAs targeting PDZ-RhoGEF or a control non-targeting siRNA. Cells were serum starved for 16 h. Cell lysates were harvested and equal amounts of proteins were assessed for Rac1 activation using a Rac1 pull-down activation assay (Pierce, ThermoScientific).
